# Supplementary material
Source: publisher site journal article supplement (https://www.dovepress.com/article/381918)
Supplement: Supplementary file 1 [file get_supplementary_file.php]

Supplementary Material

# Search strategy

## Appendix 1. Database: Pubmed (Search date: February 06, 2022)

**Search Strategy:**

#1 "Sleep"[MeSH Terms]=89,451

#2 "sleep"[Title/Abstract]=189,735

#3 "Sleep Quality"[MeSH Terms]=399

#4 "sleep quality"[Title/Abstract]=19,297

#5 "sleep qualities"[Title/Abstract]=24

#6 "Sleep Wake Disorders"[MeSH Terms]=100,357

#7 "sleep wake disorders"[Title/Abstract]=396

#8 "sleep wake disorder"[Title/Abstract]=141

#9 "sleep disorder"[Title/Abstract]=4,337

#10 "sleep disorders"[Title/Abstract]=14,185

#11 "sleep deprivation"[Title/Abstract]=8,950

#12 "sleep disturbance"[Title/Abstract]=9,921

#13 "sleep disturbances"[Title/Abstract]=9,901

**#14 #1 OR #2 OR #3 OR #4 OR #5 OR #6 OR #7 OR #8 OR #9 OR #10 OR #11 OR #12 OR #13=227,970**

#15 "Perioperative Period"[MeSH Terms]=100,135

#16 "perioperative period"[Title/Abstract]=9,548

#17 "perioperative periods"[Title/Abstract]=164

#18 "perioperative"[Title/Abstract]=115,214

#19 "Preoperative Period"[MeSH Terms]=9,277

#20 "preoperative period"[Title/Abstract]=3,095

#21 "preoperative periods"[Title/Abstract]=26

#22 "preoperative"[Title/Abstract]=309,063

#23 "Postoperative Period"[MeSH Terms]=60,416

#24 "postoperative period"[Title/Abstract]=35,498

#25 "postoperative periods"[Title/Abstract]=2,122

#26 "postoperative"[Title/Abstract]=585,267

#27 "surgery"[MeSH Subheading]=2,206,291

#28 "surgery"[Title/Abstract]=1,363,288

#29 "surgeries"[Title/Abstract]=52,908

#30 "surgical"[Title/Abstract]=1,075,061

#31 "operation"[Title/Abstract]=366,847

#32 "operations"[Title/Abstract]=141,416

#33 "operative"[Title/Abstract]=310,649

#34 "General Surgery"[MeSH Terms]=40,151

#35 "general surgery"[Title/Abstract]=13,624

#36 "Anesthesia"[MeSH Terms]=199,951

#37 "anesthesia"[Title/Abstract]=180,545

#38 "anaesthesia"[Title/Abstract]=64,434

#39 "anesthetic"[Title/Abstract]=59,590

#40 "anesthetics"[Title/Abstract]=24,687

#41 "anaesthetic"[Title/Abstract]=27,423

#42 "anaesthetics"[Title/Abstract]=8,217

**#43 #15 OR #16 OR #17 OR #18 OR #19 OR #20 OR #21 OR #22 OR #23 OR #24 OR #25 OR #26 OR #27 OR #28 OR #29 OR #30 OR #31 OR #32 OR #33 OR #34 OR #35 OR #36 OR #37 OR #38 OR #39 OR #40 OR #41 OR #42=3,867,340**

**#44 #14 AND #43=20,840**

#45 "Melatonin"[MeSH Terms]=21,548

#46 "melatonin"[Title/Abstract]=27,153

#47 "n acetyl 5 methoxytryptamine"[Title/Abstract]=326

**#48 #45 OR #46 OR #47=28910**

#49 "randomized controlled trial"[Publication Type]=559,237

#50 "controlled clinical trial"[Publication Type]=649,033

#51 "randomized"[Title/Abstract]=598,081

#52 "controlled"[Title/Abstract]=875,824

#53 "trial"[Title/Abstract]=691,169

#54 "random"[Title/Abstract]=313,679

#55 "randomly"[Title/Abstract]=376,309

#56 "placebo"[Title/Abstract]=231,748

#57 "groups"[Title/Abstract]=2,339,072

**#58 #49 OR #50 OR #51 OR #52 OR #53 OR #54 OR #55 OR #56 OR #57=4,059,418**

**#59 #44 AND #48 AND #58=82**

## Appendix 2. Database: Embase (Search date: February 06, 2022)

**Search Strategy:**

#1. 'sleep'/exp=269,458

#2. 'sleep':ti,ab,kw=290,604

#3. 'sleep quality'/exp=29,346

#4. 'sleep quality':ti,ab,kw=31,569

#5. 'sleep qualities':ti,ab,kw=63

#6. 'sleep wake disorders'/exp=295,158

#7. 'sleep wake disorders':ti,ab,kw=587

#8. 'sleep wake disorder':ti,ab,kw=218

#9. 'sleep disorder'/exp=295,158

#10. 'sleep disorder':ti,ab,kw=7,926

#11. 'sleep disorders':ti,ab,kw=23,871

#12. 'sleep deprivation':ti,ab,kw=13,711

#13. 'sleep disturbance':ti,ab,kw=16,358

#14. 'sleep disturbances':ti,ab,kw=16,129

**#15. #1 OR #2 OR #3 OR #4 OR #5 OR #6 OR #7 OR #8 OR #9 OR #10 OR #11 OR #12 OR #13 OR #14=467,364**

#16. 'perioperative period'/exp=59,173

#17. 'perioperative period':ti,ab,kw=13,941

#18. 'perioperative periods':ti,ab,kw=240

#19. 'perioperative':ti,ab,kw=170,842

#20. 'preoperative period'/exp=369,278

#21. 'preoperative period':ti,ab,kw=4,417

#22. 'preoperative periods':ti,ab,kw=39

#23. 'preoperative':ti,ab,kw=435,136

#24. 'postoperative period'/exp=569,128

#25. 'postoperative period':ti,ab,kw=49,191

#26. 'postoperative periods':ti,ab,kw=2,701

#27. 'postoperative':ti,ab,kw=808,310

#28. 'surgery'/exp=5,585,952

#29. 'surgery':ti,ab,kw=1,872,121

#30. 'surgeries':ti,ab,kw=84,832

#31. 'surgical':ti,ab,kw=1,487,323

#32. 'operation':ti,ab,kw=491,586

#33. 'operations':ti,ab,kw=180,836

#34. 'operative':ti,ab,kw=458,987

#35. 'general surgery'/exp=19,483

#36. 'general surgery':ti,ab,kw=19,521

#37. 'anesthesia'/exp=393,921

#38. 'anesthesia':ti,ab,kw=237,033

#39. 'anaesthesia':ti,ab,kw=95,741

#40. 'anesthetic':ti,ab,kw=79,231

#41. 'anesthetics':ti,ab,kw=31,013

#42. 'anaesthetic':ti,ab,kw=44,205

#43. 'anaesthetics':ti,ab,kw=13,876

**#44. #16 OR #17 OR #18 OR #19 OR #20 OR #21 OR #22 OR #23 OR #24 OR #25 OR #26 OR #27 OR #28 OR #29 OR #30 OR #31 OR #32 OR #33 OR #34 OR #35 OR #36 OR #37 OR #38 OR #39 OR #40 OR #41 OR #42 OR #43=6,850,292**

**#45. #15 AND #44=74,627**

#46. 'melatonin'/exp=38,714

#47. 'melatonin':ti,ab,kw=34,207

#48. 'n acetyl 5 methoxytryptamine':ti,ab,kw=355

**#49. #46 OR #47 OR #48=43,025**

#50. 'randomized controlled trial'/exp=697,541

#51. 'randomized controlled trial':ti,ab,kw=125,010

#52. 'controlled clinical trial'/exp=873,342

#53. 'controlled clinical trial':ti,ab,kw=22,444

#54. 'randomized':ti,ab,kw=859,939

#55. 'controlled':ti,ab,kw=1,130,070

#56. 'trial':ti,ab,kw=1,009,351

#57. 'random':ti,ab,kw=379,327

#58. 'randomly':ti,ab,kw=497,393

#59. 'placebo':ti,ab,kw=337,229

#60. 'double-blind*':ti,ab,kw=229,330

#61. 'groups':ti,ab,kw=3,247,155

#62. 'rct':ti,ab,kw=47,522

**#63. #50 OR #51 OR #52 OR #53 OR #54 OR #55 OR #56 OR #57 OR #58 OR #59 OR #60 OR #61 OR #62=5,557,701**

**#64. #45 AND #49 AND #63=266**

## Appendix 3. Database: Cochrane library (Search date: February 06, 2022)

**Search Strategy:**

#1 MeSH descriptor: [Sleep] explode all trees=6,210

#2 (sleep):ti,ab,kw (Word variations have been searched)=42,766

#3 MeSH descriptor: [Sleep Quality] explode all trees=23

#4 (sleep quality):ti,ab,kw (Word variations have been searched)=16,240

#5 (sleep qualities):ti,ab,kw (Word variations have been searched)=16,231

#6 MeSH descriptor: [Sleep Wake Disorders] explode all trees=8,936

#7 (sleep wake disorders):ti,ab,kw (Word variations have been searched)=3,884

#8 (sleep wake disorder):ti,ab,kw (Word variations have been searched)=3,884

#9 (sleep disorder):ti,ab,kw (Word variations have been searched)=17,853

#10 (sleep disorders):ti,ab,kw (Word variations have been searched)=17,855

#11 (sleep deprivation):ti,ab,kw (Word variations have been searched)=1,931

#12 (sleep disturbance):ti,ab,kw (Word variations have been searched)=5,912

#13 (sleep disturbances):ti,ab,kw (Word variations have been searched)=5,911

**#14 #1 OR #2 OR #3 OR #4 OR #5 OR #6 OR #7 OR #8 OR #9 OR #10 OR #11 OR #12 OR #13=43,191**

#15 MeSH descriptor: [Perioperative Period] explode all trees=9,158

#16 (perioperative period):ti,ab,kw (Word variations have been searched)=7,777

#17 (perioperative periods):ti,ab,kw (Word variations have been searched)=7,763

#18 (perioperative):ti,ab,kw (Word variations have been searched)=21,666

#19 MeSH descriptor: [Preoperative Period] explode all trees=348

#20 (preoperative period):ti,ab,kw (Word variations have been searched)=11,942

#21 (preoperative periods):ti,ab,kw (Word variations have been searched)=11,935

#22 (preoperative):ti,ab,kw (Word variations have been searched)=45,126

#23 MeSH descriptor: [Postoperative Period] explode all trees=6,217

#24 (postoperative period):ti,ab,kw (Word variations have been searched)=36,324

#25 (postoperative periods):ti,ab,kw (Word variations have been searched)=36,281

#26 (postoperative):ti,ab,kw (Word variations have been searched)=134,904

#27 MeSH descriptor: [General Surgery] explode all trees=363

#28 (general surgery):ti,ab,kw (Word variations have been searched)=30,065

#29 (surgery):ti,ab,kw (Word variations have been searched)=234,820

#30 (surgeries):ti,ab,kw (Word variations have been searched)=234,733

#31 (surgical):ti,ab,kw (Word variations have been searched)=110,751

#32 (operation):ti,ab,kw (Word variations have been searched)=109,829

#33 (operations):ti,ab,kw (Word variations have been searched)=109,634

#34 (operative):ti,ab,kw (Word variations have been searched)=109,685

#35 MeSH descriptor: [Anesthesia] explode all trees=20,297

#36 (anesthesia):ti,ab,kw (Word variations have been searched)=72,078

#37 (anaesthesia):ti,ab,kw (Word variations have been searched)=72,078

#38 (anesthetic):ti,ab,kw (Word variations have been searched)=40,306

#39 (anesthetics):ti,ab,kw (Word variations have been searched)=40,302

#40 (anaesthetic):ti,ab,kw (Word variations have been searched)=40,306

#41 (anaesthetics):ti,ab,kw (Word variations have been searched)=40,302

**#42 #15 OR #16 OR #17 OR #18 OR #19 OR #20 OR #21 OR #22 OR #23 OR #24 OR #25 OR #26 OR #27 OR #28 OR #29 OR #30 OR #31 OR #32 OR #33 OR #34 OR #35 OR #36 OR #37 OR #38 OR #39 OR #40 OR #41=350,403**

**#43 #14 AND #42=5,179**

#44 MeSH descriptor: [Melatonin] explode all trees=1,297

#45 (melatonin):ti,ab,kw (Word variations have been searched)=3,181

#46 (n acetyl 5 methoxytryptamine):ti,ab,kw (Word variations have been searched)=26

**#47 #44 OR #45 OR #46=3,182**

**#48 #43 AND #47=159**

## Appendix 4. Database: Web of Science (Search date: February 06, 2022)

**Search Strategy:**

#1 TS=(sleep) 369,083

#2 TS=(sleep quality) 62,518

#3 TS=(sleep qualities) 62,518

#4 TS=(sleep wake disorders) 35,775

#5 TS=(sleep wake disorder) 35,775

#6 TS=(sleep disorder) 153,303

#7 TS=(sleep disorders) 153,303

#8 TS=(sleep deprivation) 22,885

#9 TS=(sleep disturbance) 38,037

#10 TS=(sleep disturbances) 38,037

**#11 #1 OR #2 OR #3 OR #4 OR #5 OR #6 OR #7 OR #8 OR #9 OR #10 369,083**

#12 TS=(perioperative period) 34,973

#13 TS=(perioperative periods) 34,973

#14 TS=(perioperative) 140,626

#15 TS=(preoperative period) 67,355

#16 TS=(preoperative periods) 67,355

#17 TS=(preoperative) 366,653

#18 TS=(postoperative period) 203,248

#19 TS=(postoperative periods) 203,248

#20 TS=(postoperative) 951,823

#21 TS=(surgery) 3,604,263

#22 TS=(surgeries) 3,604,263

#23 TS=(surgical) 1,854,355

#24 TS=(operation) 1,170,707

#25 TS=(operations) 1,170,707

#26 TS=(operative) 425,676

#27 TS=(general surgery) 1,119,768

#28 TS=(anesthesia) 338,456

#29 TS=(anaesthesia) 83,642

#30 TS=(anesthetic) 202,471

#31 TS=(anesthetics) 202,471

#32 TS=(anaesthetic) 202,471

#33 TS=(anaesthetics) 202,471

**#34 #12 OR #13 OR #14 OR #15 OR #16 OR #17 OR #18 OR #19 OR #20 OR #21 OR #22 OR #23 OR #24 OR #25 OR #26 OR #27 OR #28 OR #29 OR #30 OR #31 OR #32 OR #33 5,400,794**

**#35 #11 AND #34 336,85**

#36 TS=(melatonin) 43,037

#37 TS=(n acetyl 5 methoxytryptamine) 568

**#38 #36 OR #37 43,059**

#39 TS=(randomized controlled trial) 636,307

#40 TS=(controlled clinical trial) 663,085

#41 TS=(randomized) 1,085,845

#42 TS=(controlled) 8,808,151

#43 TS=(trial) 2,084,490

#44 TS=(random) 782,153

#45 TS=(randomly) 482,107

#46 TS=(placebo) 325,145

#47 TS=(double-blind*) 374,743

#48 TS=(groups) 6,399,043

#49 TS=(RCT) 35,511

**#50 #39 OR #40 OR #41 OR #42 OR #43 OR #44 OR #45 OR #46 OR #47 OR #48 OR #49 14,679,965**

**#51 #35 AND #38 AND #50 279**
